## Transmission of SARS-CoV-2 from Children and Adolescents

Victoria T. Chu<sup>\*1,2</sup>, Anna R. Yousaf<sup>\*1,2</sup>, Karen Chang<sup>1,2</sup>, Noah G. Schwartz<sup>1,2</sup>, Clinton J. McDaniel<sup>1</sup>, Christine M. Szablewski<sup>1,3</sup>, Marie Brown<sup>3</sup>, Kathryn Winglee<sup>1</sup>, Scott H. Lee<sup>1</sup>, Zhaohui Cui<sup>1</sup>, Adebola Adebayo<sup>1</sup>, Tiffany Aholou<sup>1</sup>, Minal M. Amin<sup>1</sup>, Peter Aryee<sup>3</sup>, Cindy Castaneda<sup>1</sup>, Trudy Chambers<sup>1</sup>, Amy C. Fleshman<sup>1</sup>, Christin Goodman<sup>1</sup>, Tony Holmes<sup>1</sup>, Asha Ivey-Stephenson<sup>1</sup>, Emiko Kamitani<sup>1</sup>, Susan Katz<sup>1</sup>, Jennifer K. Knapp<sup>1</sup>, Maureen Kolasa<sup>1</sup>, Maranda Lumsden<sup>3</sup>, Erin Mayweather<sup>3</sup>, Asfia Mohammed<sup>3</sup>, Anne Moorman<sup>1</sup>, Alpa Patel-Larson<sup>1</sup>, Lara Perinet<sup>1</sup>, Mark Pilgard<sup>1</sup>, Deirdre D. Pratt<sup>1</sup>, Shanica Railey<sup>1</sup>, Jaina Shah<sup>3</sup>, Dawn Tuckey<sup>1</sup>, Emilio Dirlikov<sup>1</sup>, Dale A. Rose<sup>1</sup>, Julie Villanueva<sup>1</sup>, Alicia M. Fry<sup>1</sup>, Aron J. Hall<sup>1</sup>, Hannah L. Kirking<sup>1</sup>, Jacqueline E. Tate<sup>1</sup>, Cherie L. Drenzek<sup>3</sup>, Tatiana M. Lanzieri<sup>1</sup>, Rebekah J. Stewart<sup>1</sup>

\*These authors contributed equally to this manuscript.

### Author Affiliations

1. COVID-19 Response Team, CDC
2. Epidemic Intelligence Service, CDC
3. Georgia Department of Public Health

**Disclaimer:** The findings and conclusions in this report are those of the authors and do not necessarily represent the official position of the U.S. Centers for Disease Control and Prevention.

### Correspondence:

Victoria T. Chu, MD, MPH  
1600 Clifton Road  
Atlanta, Georgia, USA 30329  
Phone: 404-498-2849  
Email: [pgz4@cdc.gov](mailto:pgz4@cdc.gov)

Anna R. Yousaf, MD  
1600 Clifton Road  
Atlanta, Georgia, USA 30329  
Phone: 404-718-3626  
Email: [pgy6@cdc.gov](mailto:pgy6@cdc.gov)

## **Abstract**

A better understanding of SARS-CoV-2 transmission from children and adolescents is crucial for informing public health mitigation strategies. We conducted a retrospective cohort study among household contacts of primary cases defined as children and adolescents aged 7–19 years with laboratory evidence of SARS-CoV-2 infection acquired during an overnight camp outbreak. Among household contacts, we defined secondary cases using the Council of State and Territorial Epidemiologists definition. Among 526 household contacts of 224 primary cases, 48 secondary cases were identified, corresponding to a secondary attack rate of 9% (95% confidence interval [CI], 7%–12%). Our findings show that children and adolescents can transmit SARS-CoV-2 to adult contacts and other children in a household setting.

## Introduction

Although children can experience severe illness from SARS-CoV-2 infection including multisystem inflammatory syndrome and death in rare cases,<sup>1</sup> most experience mild or asymptomatic illness<sup>2-4</sup> resulting in under-recognition of pediatric cases. Some studies suggest low secondary transmission from young children.<sup>5-7</sup> However, closure of schools and other youth-centric settings early in the pandemic combined with mitigation measures and selective testing limit the reliability of these conclusions.<sup>8,9</sup> Transmission to adults is of particular concern given the higher risk for severe illness from COVID-19 in older adults.<sup>10,11</sup> Here we describe secondary attack rates (SAR) among household contacts of children and adolescents who acquired SARS-CoV-2 infection during an outbreak at an overnight camp in June 2020.<sup>12</sup>

## Methods

During July 17–August 24, 2020, the Centers for Disease Control and Prevention (CDC) collaborated with local and state health departments to contact all camp attendees and their parents or guardians for a phone interview. Using a structured questionnaire, we collected demographic and clinical characteristics of camp attendees, SARS-CoV-2 testing history, and a list of household contacts. We conducted a retrospective cohort study among household contacts exposed to camp attendees aged 7–19 years with self-reported evidence of SARS-CoV-2 infection by molecular or antigen testing. We interviewed each household contact to obtain dates of exposure to the camp attendee during their infectious period, as well as SARS-CoV-2 testing history, presence of COVID-19 symptoms, and potential community exposures.

COVID-19 cases among camp attendees were defined as those with self-reported laboratory evidence of SARS-CoV-2 infection by molecular or antigen testing. Among household contacts (i.e., persons who stayed  $\geq 1$  night in the household during the camp attendee case's infectious period), COVID-19 cases and non-cases were categorized using the Council of State and Territorial Epidemiologists definitions

approved on August 5, 2020.<sup>13</sup> We did not distinguish between confirmed and probable cases among household contacts. Hereafter, we define a “primary case” as a camp attendee with the earliest onset date in the household and a “secondary case” as a household contact with confirmed or probable COVID-19. If multiple camp attendee cases resided in the same household, they were defined as coprimary cases.

We included households for which household contacts provided sufficient information for secondary case or non-case classification and excluded households in which the household contact case had a symptom onset date prior to or <2 days after the symptom onset date of the camp attendee. We described frequencies of categorical variables (i.e., demographic and clinical characteristics for primary and secondary cases, household interactions, and potential community exposures) and median, interquartile ranges (IQR), and ranges for quantitative variables (i.e., age). We used the Pearson’s chi-squared test and the Wilcoxon rank-sum test to compare the sex and age of household contacts who were interviewed with those who were not, respectively. We calculated the overall SAR by two approaches: 1) the percentage of secondary cases among all household contacts and 2) the percentage of secondary cases, excluding household contacts who were not tested for SARS-CoV-2. The 95% CI of these percentages was calculated using the Wilson score interval.

This activity was reviewed by CDC and the Georgia Department of Public Health and was conducted consistently with applicable federal laws and CDC policy as defined in 45 C.F.R. part 46, 21 C.F.R. part 56; 42 U.S.C. 241(d); 45 U.S.C. 552a; 44 U.S.C. 3501 et seq. For camp attendees aged <18 years, we obtained parental or guardian permission as well as verbal assent from the camp attendee.

## Results

We identified 224 primary cases in 194 households with 526 household contacts (Figure 1). In total, there were 163 households with one primary case and 456 household contacts, 30 households with two

coprimary cases and 68 household contacts, and one household with three coprimary cases and two household contacts.

The 224 primary cases had a median age of 14 years; 115 (51%) were female, and 198 (88%) were non-Hispanic White (Table 1). Of these, 184 (82%) were symptomatic, reporting constitutional symptoms (153; 68%), upper respiratory symptoms (110; 49%), new olfactory or taste disorders (64; 29%), gastrointestinal symptoms (49; 22%), or lower respiratory symptoms (34; 15%). None of the primary cases were hospitalized.

The 526 household contacts had a median age of 46 years (range, 1–83); 262 (50%) were female (Table 1). Among the 526 household contacts, 351 (67%) were parents, 161 (31%) were siblings, 11 (2%) were extended family members, and 3 (1%) were non-familial contacts. Both the age and sex distribution of the household contacts who were interviewed ( $n = 446$ ) and were not interviewed ( $n = 80$ ) was similar (age:  $p$ -value = 0.68; sex:  $p$ -value = 0.90). Among 434 (84%) interviewed household contacts, 400 (90%) were non-Hispanic White, 74 (14%) had at least one underlying medical condition; among contacts aged  $\geq 22$  years, 92% (255/276) reported college education or higher.

We identified 48 household contacts as secondary cases (Table 2); 25 (52%) were male, and 44 (92%) were symptomatic (Table 2). None of the 7 secondary cases among contacts aged  $< 18$  years were hospitalized; 4 (10%) of 41 secondary cases among household contacts aged  $\geq 18$  years (aged 49–77 years) were hospitalized. Of these 4 hospitalized contacts, hospital length of stay varied from 5–11 days, and 2 (50%) had no underlying medical conditions.

The SAR was 9% (48/526; 95% CI, 7%–12%). Among household contacts who reported molecular or antigen SARS-CoV-2 testing, the SAR was 12% (46/377; 95% CI, 9%–16%). Five (10%) of 48 secondary cases compared with 130 (33%) of 398 non-case household contacts reported potential community exposures. Secondary cases occurred in 35 (18%) of 194 households (Figure 2); among households with secondary cases, the SAR was 45% (48/107; 95% CI, 36–54%).

## Discussion

Following widespread transmission among camp attendees at an overnight camp,<sup>12</sup> we found that children and adolescents transmitted SARS-CoV-2 to pediatric and adult household contacts, consistent with transmission dynamics of other viral respiratory diseases.<sup>14</sup> Transmission from children to adults resulted in 10% of the adult secondary cases requiring hospitalization.

Previous household transmission investigations found an overall SAR ranging from 11%–32%, although these studies focused on adult primary cases and tested all household contacts for SARS-CoV-2.<sup>15–20</sup> Our finding of a 12% SAR among tested household contacts is in the lower end of the SAR range reported by other studies. However, due to a known camp exposure, many primary cases isolated or wore masks upon returning home. Additionally, not all household contacts were systematically tested. Furthermore, 20% of the primary cases had symptom onset while at camp. This is notable given laboratory and epidemiologic evidence indicating that transmission risk is highest during the pre-symptomatic and early onset period of illness.<sup>21,22</sup> In comparison, an investigation of childcare facility-associated outbreaks with pediatric primary cases noted a 26% SAR among contacts.<sup>23</sup>

This investigation includes a large cohort of children and adolescents identified as primary cases in their households and adds valuable evidence for SARS-CoV-2 transmission from children and adolescents. However, our findings are subject to at least three limitations. First, this was a retrospective observational study with selection and recall bias. Second, the participating household contacts were predominantly non-Hispanic White with a college degree and therefore not representative of the general population. Third, differential misclassification leading to SAR underestimation might have occurred as not all household contacts were tested for SARS-CoV-2, test results were self-reported, and many contacts were tested only once and could have been tested too early. Alternatively, SAR could

have been overestimated due to inability to distinguish household or community SARS-CoV-2 infection source, and between secondary and tertiary household transmission.

In this investigation, school-aged children and adolescents with COVID-19 transmitted SARS-CoV-2 to other children and adults in the household setting, with 10% of secondary adult cases requiring hospitalization. These findings highlight the importance of implementing effective public health guidelines to prevent SARS-CoV-2 transmission in all settings, including settings with children. Children and adolescents should remain at home,  $\geq 6$  feet apart from contacts, and have a separate sleeping space and bathroom following a known COVID-19 exposure or diagnosis. In communities with active SARS-CoV-2 spread, and particularly in congregate settings, children and adolescents should wear masks if safe to do so and maintain at least six feet distance from others to prevent SARS-CoV-2 transmission.<sup>24,25</sup>

## Acknowledgements

### *Camp attendees and their household contacts*

*Georgia Department of Public Health:* Luke Baertlein, Tiffany Baird, Aaron Blakney, Tom Campbell, Alicia Dunajcik, Amit Eichenbaum, Amanda Feldpausch, Pamela Logan, Amanda Mohammed, Stephanie O’Conner, Haley Putnam, Zoe Schneider, Brandon Shih, Kat Topf, and Bill Williamson

*Centers for Disease Control and Prevention:* Ramika Archibald, Elizabeth Dietrich, Kathy Fowler, Leah Graziano, Chad Heilig, Margaret Honein, Mark Johnson, Kelsey McDavid, Robert Montierth, Anupama Shankar, Robert Slaughter

*State health departments:* Alabama Department of Public Health, Arkansas Department of Health, Colorado Department of Public Health and Environment, Florida Department of Health, Maryland Department of Health, North Carolina Division of Public Health, South Carolina Department of Health and Environmental Control, Tennessee Department of Health, Texas Department of State Health Services

## References

1. Feldstein LR, Rose EB, Horwitz SM, et al. Multisystem Inflammatory Syndrome in U.S. Children and Adolescents. *N Engl J Med* 2020;383:334-46.
2. Team CC-R. Coronavirus Disease 2019 in Children - United States, February 12-April 2, 2020. *Morb Mortal Wkly Rep* 2020;69:422-6.
3. Dong Y, Mo X, Hu Y, et al. Epidemiology of COVID-19 Among Children in China. *Pediatrics* 2020;145.
4. Zhen-Dong Y, Gao-Jun Z, Run-Ming J, et al. Clinical and transmission dynamics characteristics of 406 children with coronavirus disease 2019 in China: A review. *J Infect* 2020;81:e11-e5.
5. Heavey L, Casey G, Kelly C, Kelly D, McDarby G. No evidence of secondary transmission of COVID-19 from children attending school in Ireland, 2020. *Euro Surveill* 2020;25.
6. Danis K, Epaulard O, Benet T, et al. Cluster of Coronavirus Disease 2019 (COVID-19) in the French Alps, February 2020. *Clin Infect Dis* 2020;71:825-32.
7. Macartney K, Quinn HE, Pillsbury AJ, et al. Transmission of SARS-CoV-2 in Australian educational settings: a prospective cohort study. *Lancet Child Adolesc Health* 2020.
8. Schuchat A, Team CC-R. Public Health Response to the Initiation and Spread of Pandemic COVID-19 in the United States, February 24-April 21, 2020. *Morb Mortal Wkly Rep* 2020;69:551-6.
9. CDC. Updated Guidance on Evaluating and Testing Persons for Coronavirus Disease 2019 (COVID-19). *Health Alert Network*; 2020.
10. Mazur NI, Higgins D, Nunes MC, et al. The respiratory syncytial virus vaccine landscape: lessons from the graveyard and promising candidates. *Lancet Infect Dis* 2018;18:e295-e311.
11. Severe Outcomes Among Patients with Coronavirus Disease 2019 (COVID-19) — United States, February 12–March 16, 2020. *Morb Mortal Wkly Rep* 2020;69:343-6.
12. Szablewski CM, Chang KT, Brown MM, et al. SARS-CoV-2 Transmission and Infection Among Attendees of an Overnight Camp - Georgia, June 2020. *Morb Mortal Wkly Rep* 2020;69:1023-5.
13. Prevention CfDCA. Coronavirus Disease 2019 (COVID-19) 2020 Interim Case Definition, CSTE Position Statement(s). 2020.
14. MacIntyre CR, Ridda I, Seale H, et al. Respiratory viruses transmission from children to adults within a household. *Vaccine* 2012;30:3009-14.
15. Lewis NM, Chu VT, Ye D, et al. Household Transmission of SARS-CoV-2 in the United States. *Clin Infect Dis* 2020.
16. Jing QL, Liu MJ, Yuan J, et al. Household Secondary Attack Rate of COVID-19 and Associated Determinants. *medRxiv* 2020.
17. Wu J, Huang Y, Tu C, et al. Household Transmission of SARS-CoV-2, Zhuhai, China, 2020. *Clin Infect Dis* 2020.
18. Park YJ, Choe YJ, Park O, et al. Contact Tracing during Coronavirus Disease Outbreak, South Korea, 2020. *Emerg Infect Dis* 2020;26.
19. Bi Q, Wu Y, Mei S, et al. Epidemiology and transmission of COVID-19 in 391 cases and 1286 of their close contacts in Shenzhen, China: a retrospective cohort study. *Lancet Infect Dis* 2020;20:911-9.
20. Li W, Zhang B, Lu J, et al. The characteristics of household transmission of COVID-19. *Clin Infect Dis* 2020.
21. Heald-Sargent T, Muller WJ, Zheng X, Rippe J, Patel AB, Kocielek LK. Age-Related Differences in Nasopharyngeal Severe Acute Respiratory Syndrome Coronavirus 2 (SARS-CoV-2) Levels in Patients With Mild to Moderate Coronavirus Disease 2019 (COVID-19). *JAMA Pediatr* 2020.
22. He X, Lau EHY, Wu P, et al. Temporal dynamics in viral shedding and transmissibility of COVID-19. *Nat Med* 2020;26:672-5.

23. Lopez AS HM, Antezano J, et al. Transmission Dynamics of COVID-19 Outbreaks Associated with Child Care Facilities — Salt Lake City, Utah, April–July 2020. Morb Mortal Wkly Rep.
24. Strategies for Protecting K-12 School Staff from COVID-19. 2020. (Accessed 9/13/2020, at <https://www.cdc.gov/coronavirus/2019-ncov/community/schools-childcare/k-12-staff.html>.)
25. CDC. Interim Guidance for Administrators of US Institutions of Higher Education. 2020.

**Table 1.** Demographic and clinical characteristics of primary cases and their household contacts\*

| Characteristics                               | Primary Cases<br>n = 224 |     | Household Contacts<br>n = 526 <sup>†</sup> |    |
|-----------------------------------------------|--------------------------|-----|--------------------------------------------|----|
|                                               | n                        | %   | n                                          | %  |
| Age (years): median (interquartile range)     | 14 (7–19)                |     | 46 (20–51)                                 |    |
| Sex                                           |                          |     |                                            |    |
| Female                                        | 115                      | 51  | 262                                        | 50 |
| Male                                          | 109                      | 49  | 262                                        | 50 |
| Unknown                                       | 0                        | 0   | 2                                          | <1 |
| Race/ethnicity group                          |                          |     |                                            |    |
| Non-Hispanic White                            | 198                      | 88  | 400                                        | 76 |
| Non-Hispanic Black                            | 0                        | 0   | 1                                          | <1 |
| Hispanic or Latino                            | 9                        | 4   | 10                                         | 2  |
| Other                                         | 6                        | 3   | 10                                         | 2  |
| Unknown                                       | 11                       | 5   | 101                                        | 19 |
| ≥1 underlying medical condition <sup>‡</sup>  | 14                       | 6   | 74                                         | 14 |
| Chronic lung disease                          | 12                       | 6   | 28                                         | 6  |
| Cardiovascular disease                        | 0                        | 0   | 26                                         | 5  |
| Diabetes Mellitus                             | 0                        | 0   | 10                                         | 2  |
| Immunocompromising condition or medication    | 0                        | 0   | 10                                         | 2  |
| Evidence of SARS-CoV-2 infection <sup>§</sup> |                          |     |                                            |    |
| Positive                                      | 224                      | 100 | 46                                         | 9  |
| Negative                                      | 0                        | 0   | 331                                        | 63 |
| Never tested                                  | 0                        | 0   | 149                                        | 28 |

\*A primary case was defined as a camp attendee with self-reported evidence of SARS-CoV-2 infection by molecular or antigen testing and the earliest onset date in the household. A household contact was defined as a person who stayed ≥1 night in the household during the primary case's infectious period (i.e., 2 days prior to the onset date until 10 days after the onset date).

<sup>†</sup>Only age, sex, and SARS-CoV-2 testing status were known for the 80 household contacts who were not interviewed.

<sup>‡</sup>Denominator was 216 for primary cases and 441 for household contacts.

<sup>§</sup>A COVID-19 case was defined as laboratory evidence of SARS-CoV-2 infection included positive molecular or antigen testing and was self-reported.

**Table 2.** Demographic and clinical characteristics of household contacts with COVID-19 and other household contacts

|                                              | <b>Household Contacts with<br/>COVID-19<br/>n = 48</b> |          | <b>Other Household Contacts<br/>n = 478*</b> |          |
|----------------------------------------------|--------------------------------------------------------|----------|----------------------------------------------|----------|
| <b>Household contact<br/>characteristics</b> | <b>n</b>                                               | <b>%</b> | <b>N</b>                                     | <b>%</b> |
| ≥1 underlying medical condition†             | 12                                                     | 26       | 63                                           | 13       |
| Chronic lung disease                         | 6                                                      | 13       | 22                                           | 6        |
| Cardiovascular disease                       | 5                                                      | 11       | 20                                           | 5        |
| Diabetes mellitus                            | 3                                                      | 6        | 7                                            | 2        |
| Immunocompromising condition or medication   | 4                                                      | 9        | 6                                            | 2        |
| Evidence of SARS-CoV-2 infection‡            |                                                        |          |                                              |          |
| Positive                                     | 46                                                     | 96       | 0                                            | 0        |
| Negative                                     | 0                                                      | 0        | 331                                          | 69       |
| Never tested                                 | 2                                                      | 4        | 147                                          | 31       |
| Frequency of SARS-CoV-2 testing§             |                                                        |          |                                              |          |
| 0                                            | 3                                                      | 6        | 162                                          | 34       |
| 1                                            | 34                                                     | 71       | 227                                          | 47       |
| ≥2                                           | 11                                                     | 23       | 89                                           | 19       |

\*Only SARS-CoV-2 testing status was known for the 80 household contacts who were not interviewed; none of whom were identified as household contacts with COVID-19.

†Denominator was 47 for cases and 394 for non-cases household contacts.

‡Laboratory evidence of SARS-CoV-2 infection included positive molecular or antigen testing and was self-reported.

§Excludes any additional tests obtained after the first positive SARS-CoV-2 molecular or antigen test.

**Figure 1.** Flow diagram for enrollment of persons with COVID-19 identified as primary cases and their household contacts\*

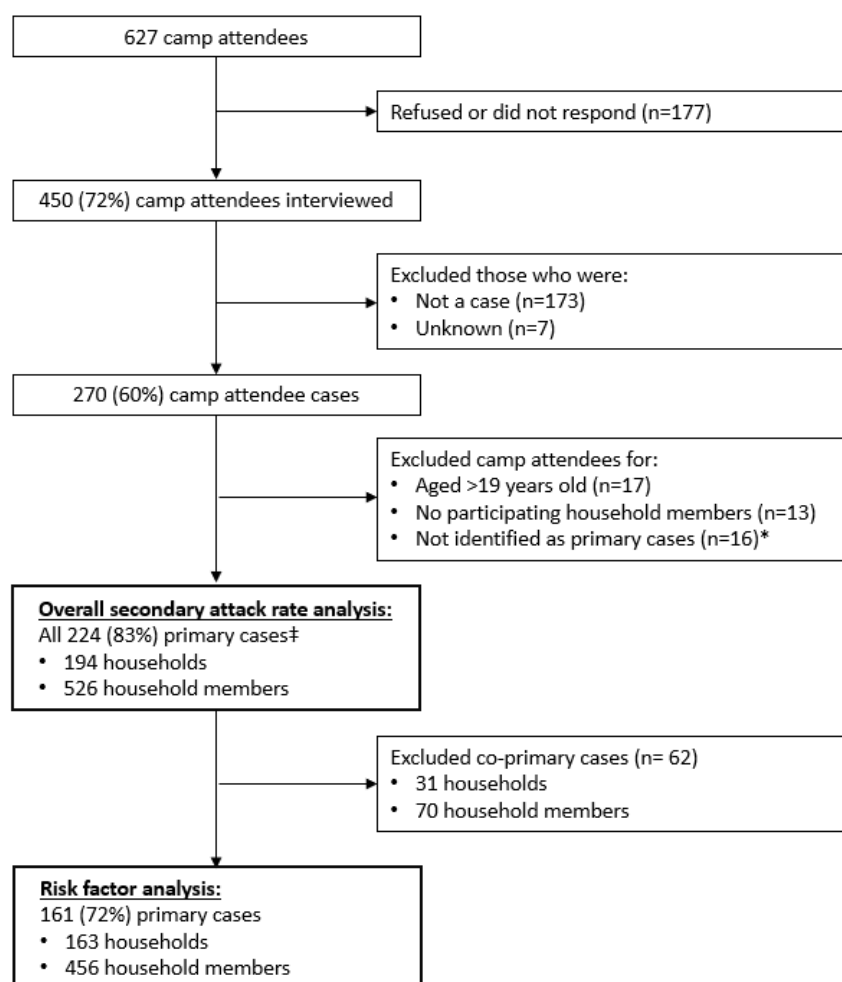

\*A primary case was defined as a camp attendee with self-reported evidence of SARS-CoV-2 infection by molecular or antigen testing and the earliest onset date in the household. A household contact was defined as a person who stayed  $\geq 1$  night in the household during the primary case's infectious period (i.e., 2 days prior to the onset date until 10 days after the onset date).

†Not identified as primary case includes 4 missing onset date, and 12 with household contacts with an onset date prior to or  $< 2$  days after the onset date of the camp attendee.

‡The primary case was defined as the case with the earliest onset date in the household.

**Figure 2.** Scatter plot of household secondary attack rates (SAR) by the number of primary cases per household and the median SAR, excluding households with no secondary cases, by the number of primary cases per household

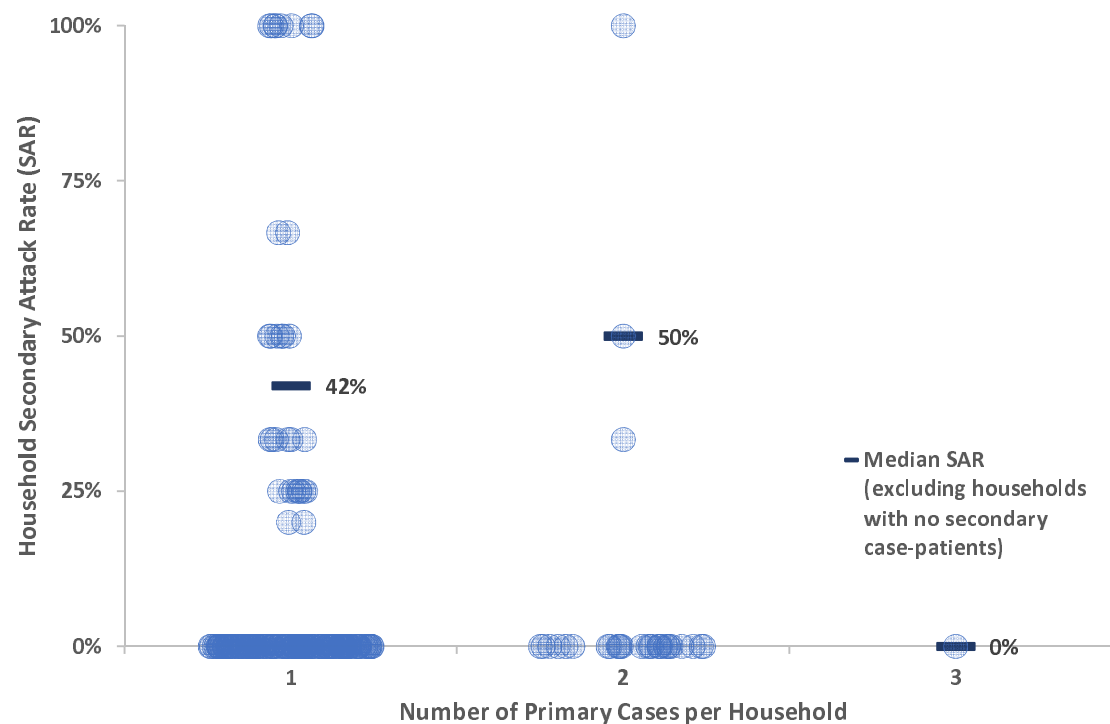

Source: https://medrxiv.org/content/10.1101/2020.10.10.20210492.full.pdf
